# Supplementary material for: Far-Red-Light-Induced Morphology Changes, Phytohormone, and Transcriptome Reprogramming of Chinese Kale (Brassica alboglabra Bailey)
Source: MDPI journal article supplement (doi:10.3390/ijms24065563), 2023-03-14
Supplement: s1 [file s1]

Additional files: Figure S1-S2

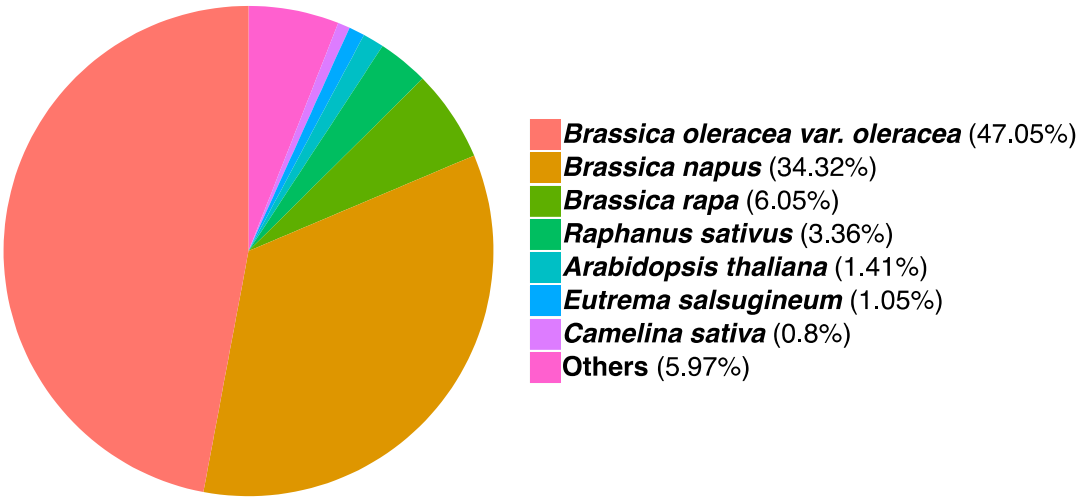

**Figure S1.** Statistical map of species information distribution of unigenes annotated to the Nr database

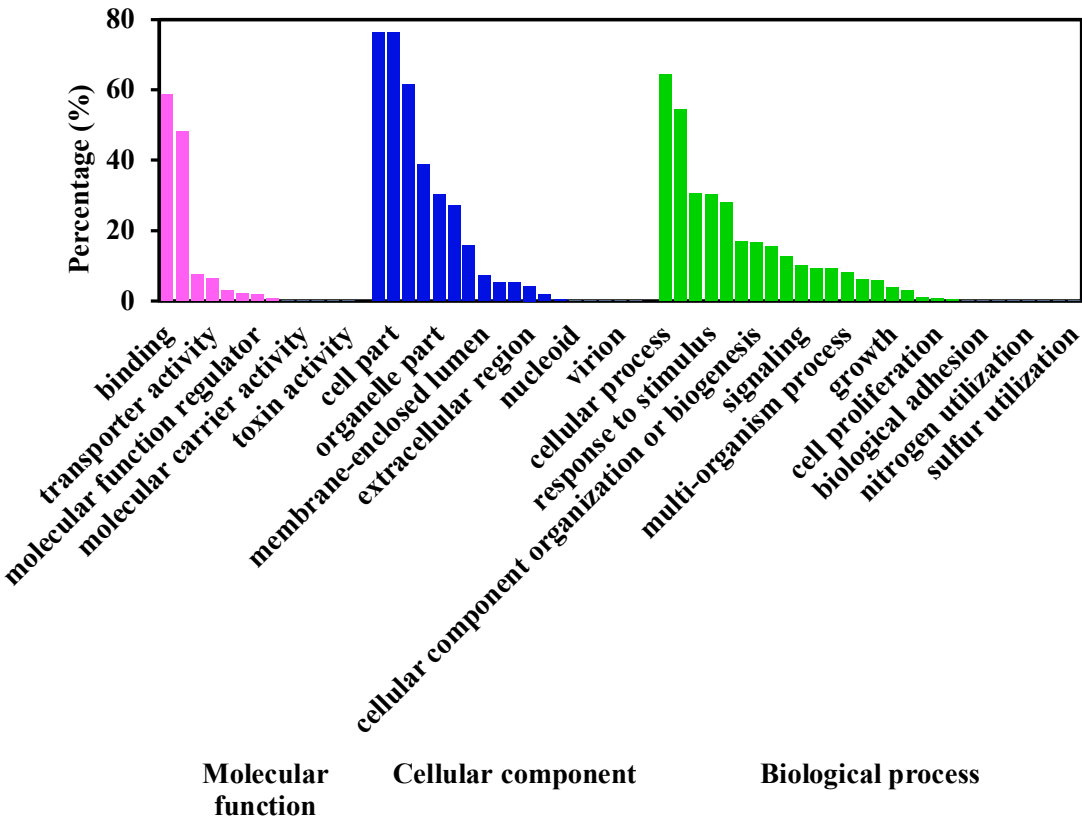

**Figure S2.** Statistical plot of taxonomic information of unigenes annotated to the Gene Ontology (GO) database

# Additional files: Table S1-S3

**Table S1.** Statistics for raw reads and clean reads of RNA-sequencing

| Library | Raw reads | Clean reads | Clean Base (G) | Q20 (%) | Q30 (%) | GC (%) |
|---------|-----------|-------------|----------------|---------|---------|--------|
| CK-1    | 53220140  | 52564442    | 7.88           | 98.08   | 94.35   | 46.81  |
| CK-2    | 61331670  | 60620026    | 9.09           | 97.98   | 94.07   | 46.70  |
| CK-3    | 62100526  | 61470202    | 9.22           | 98.03   | 94.26   | 46.91  |
| FR 3-1  | 65903748  | 65110278    | 9.77           | 98.02   | 94.21   | 46.82  |
| FR 3-2  | 56312136  | 55685464    | 8.35           | 98.09   | 94.35   | 46.89  |
| FR 3-3  | 59929424  | 59182052    | 8.88           | 98.06   | 94.29   | 46.76  |
| FR 6-1  | 54471082  | 53899038    | 8.08           | 98.13   | 94.43   | 46.70  |
| FR 6-2  | 47390036  | 46602254    | 6.99           | 98.19   | 94.59   | 46.72  |
| FR 6-3  | 47643778  | 46917882    | 7.04           | 98.10   | 94.38   | 46.80  |

CK, FR-3, and FR-6 indicate far-red light supplementation at  $0\text{ W}\cdot\text{m}^{-2}$ ,  $3\text{ W}\cdot\text{m}^{-2}$ , and  $6\text{ W}\cdot\text{m}^{-2}$ , respectively.

**Table S2.** Assembly results of transcripts and unigenes

| Type       | Number | N50 (nt) | N90 (nt) | Mean length (nt) | Total bases (nt) |
|------------|--------|----------|----------|------------------|------------------|
| Transcript | 171879 | 1750     | 579      | 1192             | 204817517        |
| Unigene    | 145746 | 1801     | 696      | 1356             | 197666891        |

**Table S3.** Statistics for annotation obtained from seven databases

| Public protein database                                                                                                                                                                                     | Number of unigene hit | Percentage (%) |
|-------------------------------------------------------------------------------------------------------------------------------------------------------------------------------------------------------------|-----------------------|----------------|
| KEGG                                                                                                                                                                                                        | 99954                 | 68.58          |
| <a href="https://www.kegg.jp/">https://www.kegg.jp/</a>                                                                                                                                                     |                       |                |
| NR                                                                                                                                                                                                          | 129367                | 88.76          |
| <a href="https://ftp.ncbi.nlm.nih.gov/blast/db/FASTA/">https://ftp.ncbi.nlm.nih.gov/blast/db/FASTA/</a>                                                                                                     |                       |                |
| SwissProt                                                                                                                                                                                                   |                       |                |
| <a href="https://www.uniprot.org/uniprotkb/?facets=reviewed%3Atrue&amp;fil=reviewed%3Ayes&amp;query=%2A">https://www.uniprot.org/uniprotkb/?facets=reviewed%3Atrue&amp;fil=reviewed%3Ayes&amp;query=%2A</a> | 93560                 | 64.19          |
| Trembl                                                                                                                                                                                                      |                       |                |
| <a href="https://www.uniprot.org/release-notes/2004-03-02-full">https://www.uniprot.org/release-notes/2004-03-02-full</a>                                                                                   | 131136                | 89.98          |
| KOG                                                                                                                                                                                                         | 77119                 | 52.91          |
| <a href="ftp://ftp.ncbi.nih.gov/pub/COG/KOG/kyva">ftp://ftp.ncbi.nih.gov/pub/COG/KOG/kyva</a>                                                                                                               |                       |                |
| GO                                                                                                                                                                                                          | 107763                | 73.94          |
| <a href="http://geneontology.org/">http://geneontology.org/</a>                                                                                                                                             |                       |                |
| Pfam (replaced by InterPro)                                                                                                                                                                                 | 93320                 | 64.03          |
| <a href="https://www.ebi.ac.uk/interpro/">https://www.ebi.ac.uk/interpro/</a>                                                                                                                               |                       |                |
| Annotated in at least one Database                                                                                                                                                                          | 133129                | 91.34          |
| Total Unigenes                                                                                                                                                                                              | 145746                | 100            |
